# Supplementary material for: Concurrent use of metformin enhances the efficacy of EGFR-TKIs in patients with advanced EGFR-mutant non-small cell lung cancer—an option for overcoming EGFR-TKI resistance
Source: PubMed Central journal article supplement — Transl Lung Cancer Res. 2021 Mar;10(3):1277–91. doi: 10.21037/tlcr-20-1153 (PMC8044488; doi:10.21037/tlcr-20-1153), 2021-03
Supplement: tlcr-10-03-1277-dss.pdf [file tlcr-10-03-1277-dss.pdf]

## Data Sharing Statement

|                     |                                                                                                                                                     |                                                                                         |
|---------------------|-----------------------------------------------------------------------------------------------------------------------------------------------------|-----------------------------------------------------------------------------------------|
| <b>Article Info</b> | <a href="http://dx.doi.org/10.21037/tlcr-20-1153">http://dx.doi.org/10.21037/tlcr-20-1153</a>                                                       |                                                                                         |
| <b>Item</b>         | <b>Question</b>                                                                                                                                     | <b>Authors' Response<br/>(place "-" if not applicable)</b>                              |
| 1                   | Would you like to share data collected for your study to others?                                                                                    | We do not like to share data collected for our study to others.                         |
| 2                   | If not, would you like to share the reason for your decision?                                                                                       | Our study is a retrospective analysis and some survival data are still under follow-up. |
| 3                   | What data in particular will be shared?                                                                                                             | -                                                                                       |
| 4                   | Any other documents will be shared? Such as study protocol, statistical analysis plan, informed consent form, clinical study report, analytic code. | -                                                                                       |
| 5                   | When will data availability begin?                                                                                                                  | -                                                                                       |
| 6                   | When will data availability end?                                                                                                                    | -                                                                                       |
| 7                   | To whom will you share the data?                                                                                                                    | -                                                                                       |
| 8                   | For what type of analysis or purpose?                                                                                                               | -                                                                                       |
| 9                   | How or where can the data/documents be obtained?                                                                                                    | -                                                                                       |
| 10                  | Any other restrictions?                                                                                                                             | -                                                                                       |
